# Supplementary material
Source: PubMed Central journal article supplement (PMC2259071)
Supplement: plntphys_pp.107.109553_1.pdf [file plntphys_pp.107.109553_1.pdf]

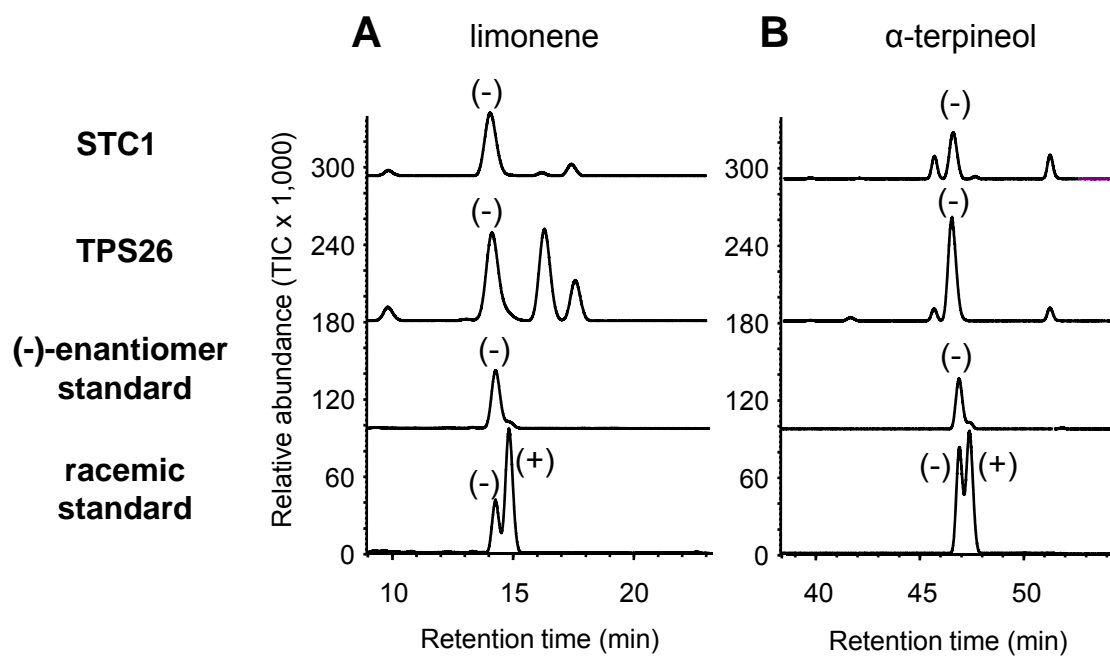

**Supplemental  
Figure 1**

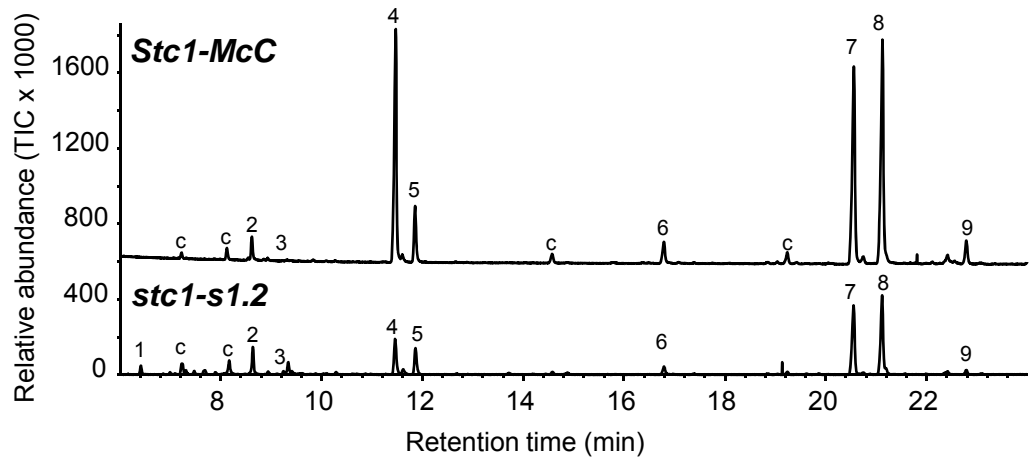

Supplemental  
Figure 2

1 HTGSSYACTCTAFRSISTKLAARSSAGRRSRGRSSAVDFPS STC1-B73  
1 NAG-----ITG-VNMNKLAAAPSSGRHSRRCRPAVVPSS TPS26-B73  
1 NQT-----T--RCVGLAFLPAKGSHHH-----KA Sorghum pred. TPS1/26

41 AGGPPPLPPPVIAGAVASPGKRMPPSPIGCTSRRAATHSS STC1-B73  
33 AG-KQMLLVRRHPPGASASWPTRATGGGGGGVPAGATARDG TPS26-B73  
23 AG-----ASRAAPVVLIGGSVKLVLLSRQLVCFSS Sorghum pred. TPS1/26

81 SRQAKED---DGASRNVSGFEPSIHGDFFLTYSPLATSS STC1-B73  
72 SGQAKEEEEEDRASANTSSFEPSIHGDFFLTYSPLATSS TPS26-B73  
52 -----WSRHRVR---TWSARRAASSATTPRQE Sorghum pred. TPS1/26

118 LHKAWMYHRAEQLKEEVAAKLVAASBACSLHARRIHLIHVL STC1-B73  
112 RQKARMVHRAEQLKQVAA-KLVAASBACSLVHRIHLVDAL TPS26-B73  
76 LLETAMIERANHLTRNVS-KIISASSNCSLVERMQLNML Sorghum pred. TPS1/26

158 ERLCLDHLFEDEISDHLARMNDV-DVSGCDLOTVAMWVFL STC1-B73  
115 ERLCLDHLFEDEINDMVTQHNV-DVSGCDLOTVAMWVFL TPS26-B73  
115 ERLCLDHLFEDEELNVLISEIYKTNDISGSDLOTTALWVFL Sorghum pred. TPS1/26

197 LAKHGVSVS--SD-VFAEFRADEQDGGGFTANSARDLLSLHC STC1-B73  
190 LANHGVSVS--SDVVFARDEQDGG-FRANNPRDLLNLYN TPS26-B73  
155 LAKHGVQVS PASD-VFAKFKDEQDN-FRANNPLDVLSLYN Sorghum pred. TPS1/26

234 RACLATRGETILDERISFTAKSLKSTAPVT-GASLACEI STC1-B73  
227 RACLATHGETILDERASFTSKCLKSLAPVTYMERASLASEI TPS26-B73  
193 RAYLATNGEIIILDERAVSFTKRSLLESLLTN--LQGPLAHEV Sorghum pred. TPS1/26

273 KRALEIPLPRVRIVE-AKSRIAEVGREAREADELVME LAK STC1-B73  
267 KRALEIPLPRSVRIYG-AKSRIAEVGNQTEANELVLELAK TPS26-B73  
231 KCALEIPLPRVRIVEARKVYI AVHG---QANEVIMELAK Sorghum pred. TPS1/26

312 LNYNLVQLQYQDELKIIITSRWANGLELOSRLSFARDRVVE STC1-B73  
306 LNYNLVQLQHQEELKIIIT-RWANDLELOTALSFARDRVVE TPS26-B73  
268 LNSNIQLQYQDELRIIIT-RWANKLELESRLSFARDRVVE Sorghum pred. TPS1/26

352 CVFHWVGVVYFEPSSVSRARIILTKVIAIVSLLDDTYDVGVT STC1-B73  
345 CVFHWVGVVYFEPSSVSRARVILSKVLAIVSLLDDTYDVGVT TPS26-B73  
307 CVFHWVGVVYFEPSSVSRGRIILTKVLAIVSILDDTYDVGVT Sorghum pred. TPS1/26

392 PDECELFTECIESWDPAVAGG-LPENMKFIFGKILODTVQS STC1-B73  
385 SDECELFTECIESWDPAATGGRLPGNMKFIFAKILOTCQS TPS26-B73  
347 LDECELFTECVESWDPMVANG-LPENMKFIFGKINDTVQS Sorghum pred. TPS1/26

431 IEELAPEEKVYRMPYIKNFIIDLVRAYNKEVRAWREQGVVP STC1-B73  
425 FEDELAPDEKVRMHYKTFIIDLVRAYNEEVKWRREQGVVP TPS26-B73  
386 IEDELSPEEKVYRMPYIKNFIIDLVRAYNKEVYKWRREQGVVP Sorghum pred. TPS1/26

471 RTVEEHLQVSARSOGACHLLSCASFGMGDVA GEEAFEDWVC STC1-B73  
465 RTVEEHLQVSARSOGACHLLSCTSFVGMGDVADQEARFEDVVR TPS26-B73  
426 RTVEEHLQVSARSOGACHLLSCASFGMTDIATKEAFEDWVS Sorghum pred. TPS1/26

511 SVPKLVQALCIIILRLSDDLKSYE-REKMAPHVASTIESCM STC1-B73  
505 GVPKIVKALCIIILRLSDDLKSYEVAREKMS SHVASTMESCM TPS26-B73  
466 NVPKLVKTL CIIILRLSDDLKSYE-REKMTCHVASTIESCM Sorghum pred. TPS1/26

550 REHEVPLEVAVKIDEMIDETAKDFNEEHLNMN--KHQPA STC1-B73  
545 KEHVPLEVAVKIDETIDETAKDFNEEHLNLTNSHLPR TPS26-B73  
505 KEHKVPIHVAREIIDMIEETAKDFNKENFTN--NHVPK Sorghum pred. TPS1/26

588 ELLERIFNLTATMVMYKNDDAYTNCHVIKDTINSLFVEP STC1-B73  
585 ELLERIFNLTATMVMYIQDDAYTNCHVIKDTINSLFVEP TPS26-B73  
543 ELLERIFNLTATMEFMYKQDDAYTNCHVIKDTISKLFVEH Sorghum pred. TPS1/26

628 VSI A STC1-B73  
625 VSI T TPS26-B73  
583 YLM I Sorghum pred. TPS1/26

Supplemental  
Figure 3

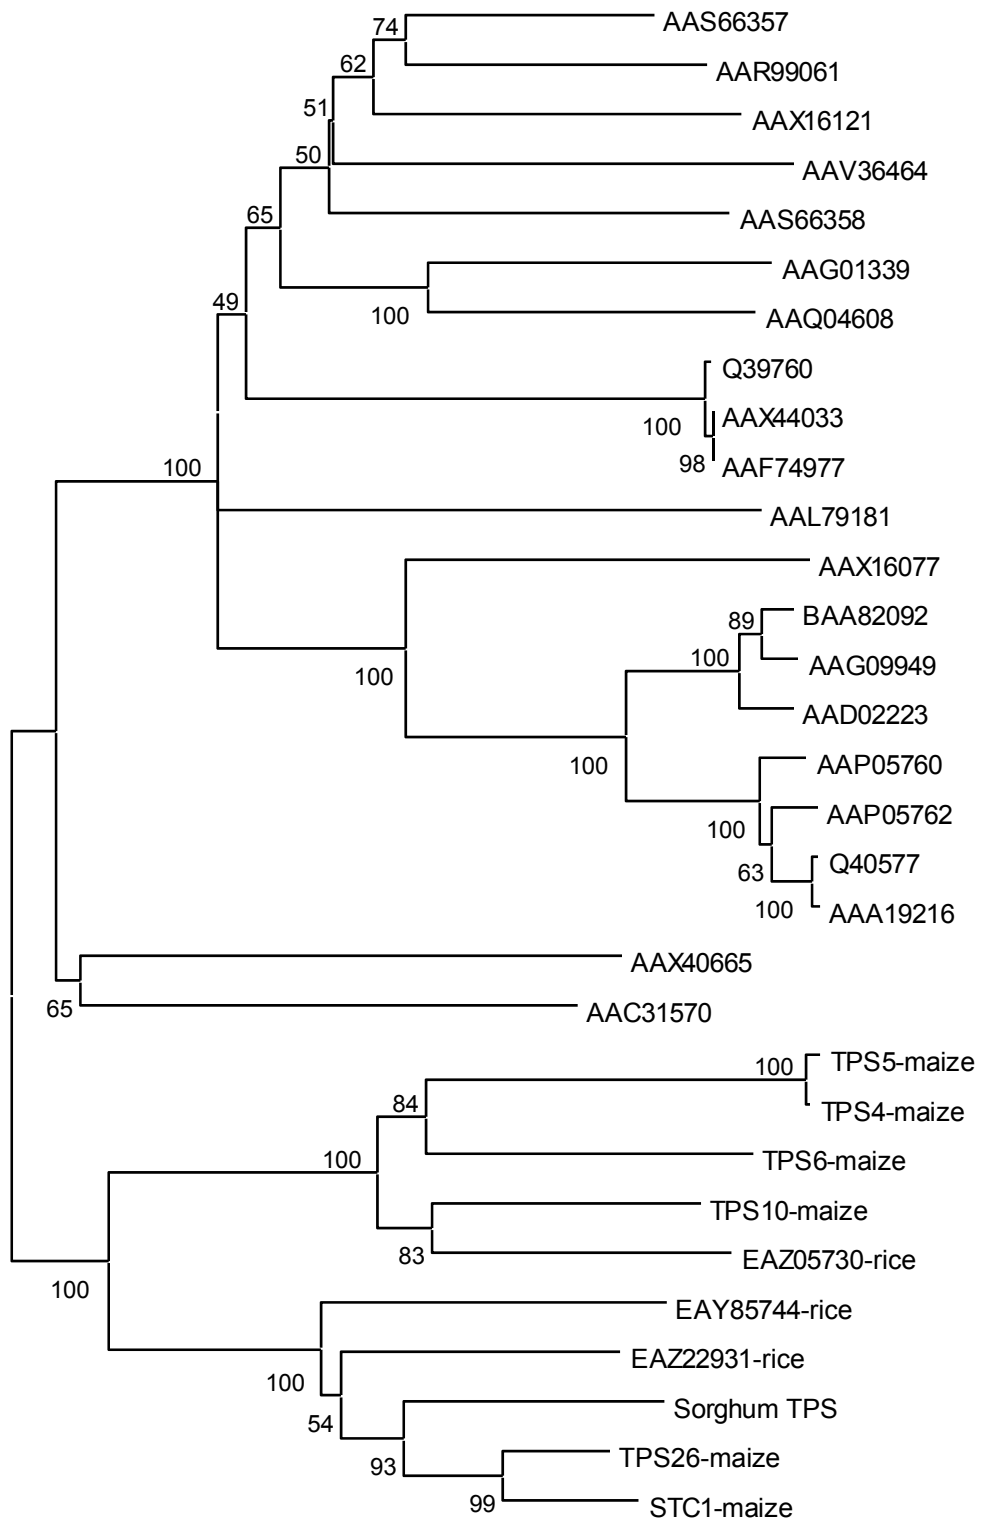

**Supplemental  
Figure 4**
